# Supplementary material for: Carbon layer-protected self-supporting CoSe2 nanowire arrays for durable hydrogen evolution reaction catalysts
Source: Royal Society of Chemistry journal article supplement (doi:10.1039/d3se00420a), 2023-01-01
Supplement: d3se00420a1.pdf [file d3se00420a1.pdf]

Supplementary Information

**Carbon layer protected self-supporting CoSe<sub>2</sub> nanowire  
arrays for super durable hydrogen evolution reaction  
catalyst**

Xinyue Wang,<sup>a</sup> Yibin Wang,<sup>a</sup> Xinzhi Ma<sup>\*a</sup>, Lingling Xu,<sup>a</sup> Sirui Liu,<sup>a</sup> Wei Wang,<sup>a</sup> Huiqing Lu<sup>\*a</sup>,

and Lili Wu<sup>a</sup>

*Key Laboratory for Photonic and Electronic Bandgap Materials, Ministry of Education, School of*

*Physics and Electronic Engineering, Harbin Normal University, Harbin, 150025, People's*

*Republic of China. E-mail: wll790107@hotmail.com; maxz@hrbnu.edu.cn*

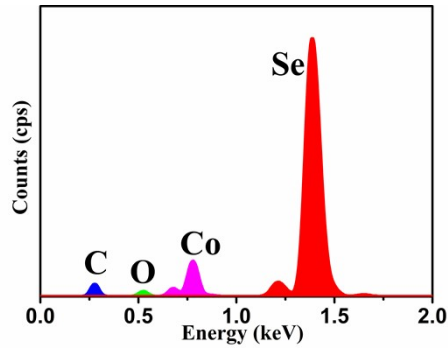

Fig. S1 The EDX energy spectrum of C@CoSe<sub>2</sub>/CC.

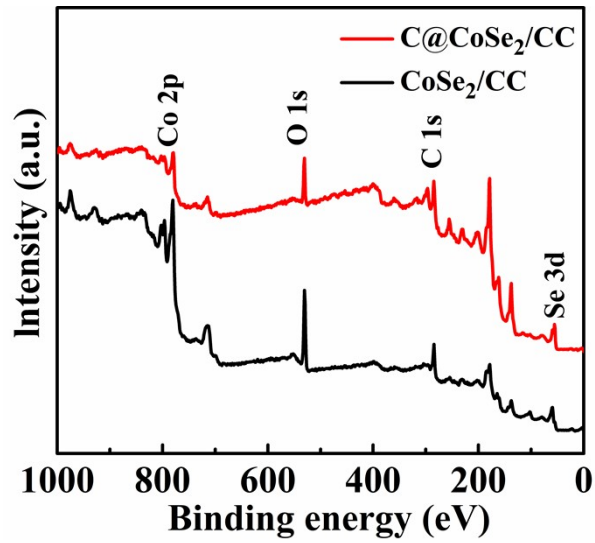

Fig. S2 The XPS Spectra of C@CoSe<sub>2</sub>/CC and CoSe<sub>2</sub>/CC.

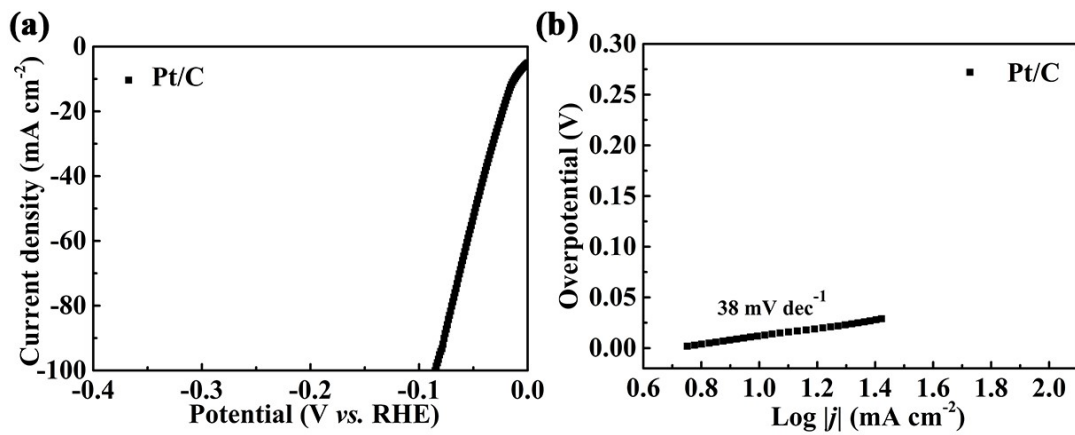

Figs. S3 (a) Polarization curves of Pt/C measured at a scan rate of 5 mV/s. (b) Tafel slope for Pt/C.

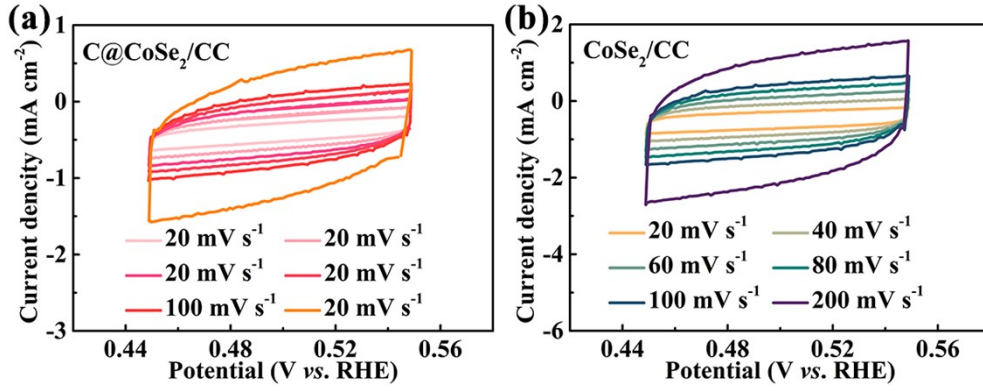

Figs. S4 CV curves obtained from different scan rates. (a) for C@CoSe<sub>2</sub>/CC, (b) CoSe<sub>2</sub>/CC.

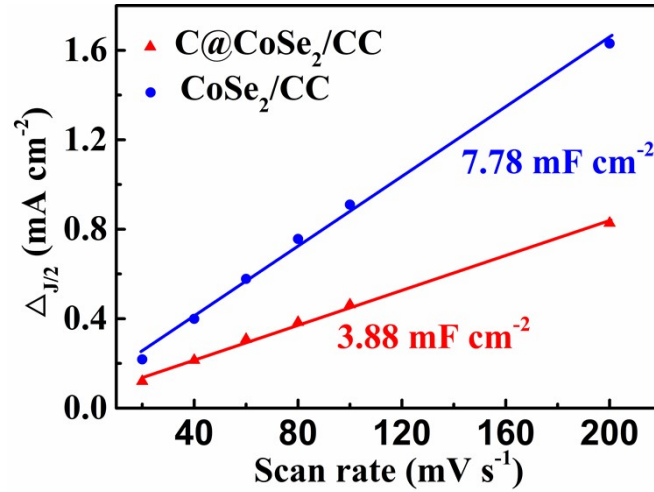

Fig. S5  $C_{dl}$  fitted lines

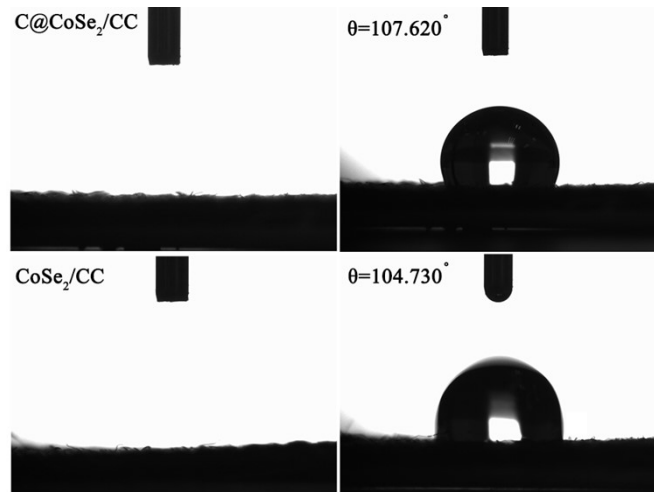

Fig. S6 The water contact angle images of CoSe<sub>2</sub>/CC and C@CoSe<sub>2</sub>/CC.

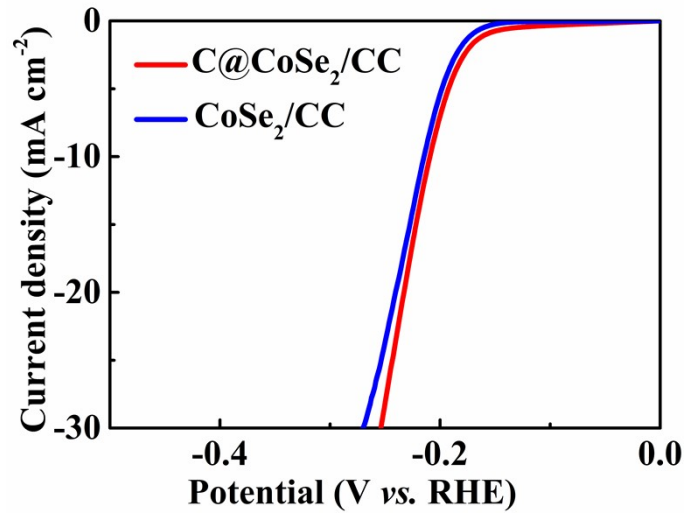

Fig. S7  $C_{dl}$ -normalized LSV curves.

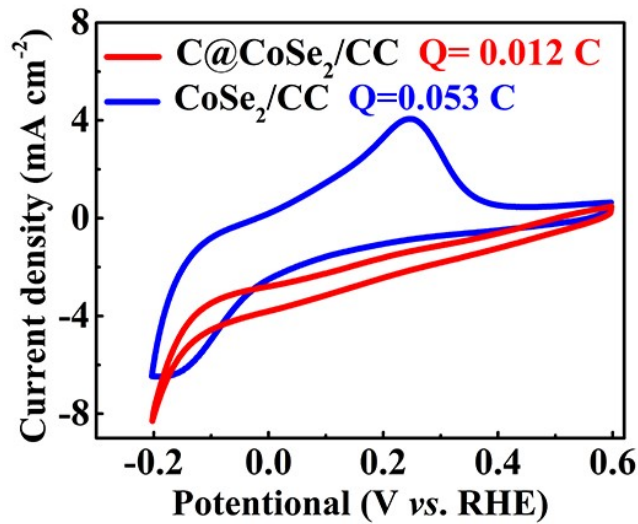

Fig. S8 CV curves measured in phosphate buffer at pH=7.

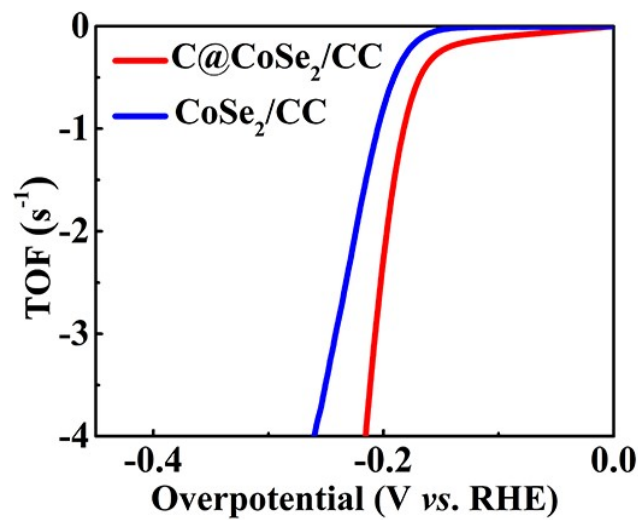

Fig. S9 TOF data.

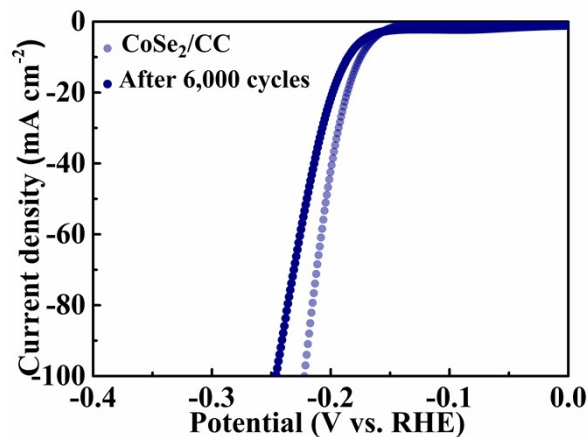

Fig. S10 Polarization curves before and after 6,000 cycles of CoSe<sub>2</sub>/CC.

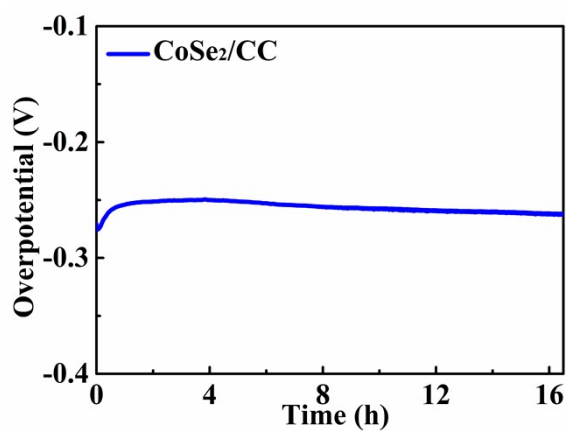

Fig. S11 Long-term stability measurement of CoSe<sub>2</sub>/CC measured at a current density of 30 mA cm<sup>-2</sup>.

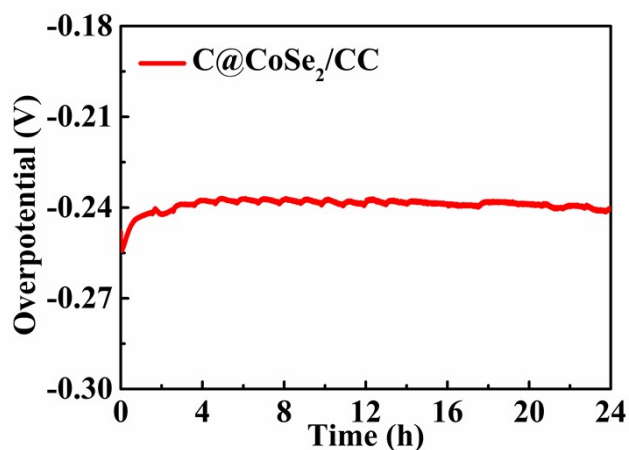

Fig. S12 Long-term stability measurement of C@CoSe<sub>2</sub>/CC measured at a current density of 30 mA cm<sup>-2</sup>.

Table S1. The stability of C@CoSe<sub>2</sub>/CC compared with other HER catalysts.

| Catalysts                                | $\eta_{10}$ / mV | Stability test conditions (mA cm <sup>-2</sup> ) | Long cycle stability test time (h) | Refs.           |
|------------------------------------------|------------------|--------------------------------------------------|------------------------------------|-----------------|
| <b>C@CoSe<sub>2</sub>/CC</b>             | <b>179</b>       | <b>30</b>                                        | <b>24</b>                          | <b>Our work</b> |
| CoSe <sub>2</sub>                        | 272              | 20                                               | 8                                  | s1              |
| CoSe <sub>2</sub> @HC                    | 189.2            | 10                                               | 12                                 | s2              |
| CoSe <sub>2</sub> /GD                    | /                | 10                                               | 24                                 | s3              |
| CoSe                                     | 186.1            | 10                                               | 10                                 | 18              |
| CoSe <sub>2</sub> /CFP                   | 219              | /                                                | /                                  | s4              |
| CoSe <sub>2</sub> /CoP                   | 140              | 10                                               | 10                                 | s4              |
| CoSe <sub>2</sub> /CNTs                  | 186              | 35                                               | 22                                 | s5              |
| CoSe <sub>2</sub> /CNTAs                 | 204              | 10                                               | 8                                  | s6              |
| CoSe <sub>2</sub> NP/GC                  | 200              | /                                                | /                                  | s7              |
| CoSe <sub>2</sub> @G                     | 210              | 22                                               | 20                                 | s8              |
| CoSe <sub>2</sub> @DC                    | 132              | 10                                               | 20                                 | 29              |
| CoSe <sub>2</sub> /DC                    | 206              | /                                                | /                                  | 29              |
| MoSe <sub>2</sub> /CoSe <sub>2</sub>     | 200              | /                                                | /                                  | s9              |
| Co <sub>3</sub> O <sub>4</sub> NPs       | 300              | /                                                | /                                  | s10             |
| CoSe <sub>2</sub> @CP                    | 234              | /                                                | /                                  | s11             |
| N-CoSe <sub>2</sub> @CP                  | 106~200          | 10                                               | 24                                 | s11             |
| c-CoSe <sub>2</sub> @Co(OH) <sub>2</sub> | 156              | 20                                               | 20                                 | s12             |
| CoSe <sub>2</sub> /MWCNT                 | 241              | /                                                | /                                  | s13             |
| RGO/CoSe <sub>2</sub>                    | 172              | 12                                               | 2.8                                | s14             |

## References

- s1 C.-L. McCarthy, C.-A. Downes, E.-C. Schueller, K. Abuyen, and R.-L. Brutchey, *ACS Energy Lett.*, 2016, **1**, 607-611.
- s2 S.-H. Yang, G.-D. Park, J.-K. Kim, Y.-C. Kang, *Chem. Eng. J.*, 2021, **424**, 162328.
- s3 H. Zhang, L. Lei and X. Zhang, *RSC Adv.*, 2014, **4**, 54344-54348.
- s4 R. Bose, T.-H. Kim, B. Koh, C.-Y. Jung, and S.-C. Yi, *ChemistrySelect*, 2017, **2**, 10661-10667.
- s5 H. Yue, B. Yu, F. Qi, J. Zhou , X. Wang, B. Zheng, W. Zhang, Y. Li, Y. Chen, *Electrochim. Acta*, 2017, **253**, 200-207.
- s6 M. Zhang, A. Hu, Z. Liu, Y. Xu, B. Fan, Q. Tang, S. Zhang, W. Deng, X. Chen, *Electrochim. Acta*, 2018, **285**, 254-261.
- s7 D. Kong, H. Wang, Z. Lu, and Y. Cui, *J. Am. Chem. Soc.*, 2014, **136**, 4897-4900.
- s8 C. Dai, X. Tian , Y. Nie, C. Tian, C. Yang, Z. Zhou, Y. Li, X. Gao, *Chem. Eng. J.*, 2017, **321**, 105-112.
- s9 C. Mu, H. Qi, Y. Song, Z. Liu, L. Ji, J. Deng, Y. Liao and F. Scarpa, *RSC Adv.*, 2016, **6**, 23-30.
- s10 R. Li, D. Zhou, J. Luo, W. Xu, J. Li, S. Li, P. Cheng, D. Yuan, *J. Power Sources*, 2017, **341**, 250-256.
- s11 G. Wei, Z. Xu, X. Zhao, S. Wang, F. Kong, C. An, *J. Alloys Compd.*, 2022, **893**, 162328.
- s12 J. Bai, Y. Wang, Y. Wang, T. Zhang, G. Dong, D. Geng, *Int. J. Energy Res.*, 2022, **46**, 12476-12484.
- s13 R. Samal, P. Mane, M. Bhat, B. Chakraborty, D.-J. Late, and C.-S. Rout, *ACS Appl. Energy Mater.*, 2021, **4**, 11386-11399.
- s14 X. Fang, Z. Wang, S. Kang, L. Zhao, Z. Jiang, M. Dong, *Int. J. Hydrog. Energy*, 2020, **45**, 1738-1747.
